# Supplementary material for: Physiological Significance of WDR45, A Responsible Gene for β-propeller Protein Associated Neurodegeneration (BPAN), in Brain Development
Source: Research Square preprint supplement (doi:10.21203/rs.3.rs-132972/v1), 2020-12-30
Supplement: Supplementary file 1 [file c8397cb5b99f994aa1d2d843.pdf]

## **Supplemental Information**

### **Physiological significance of *WDR45*, a responsible gene for b-propeller protein associated neurodegeneration (BPAN), in brain development**

Mariko Noda<sup>1</sup>, Hidenori Ito<sup>1</sup> and Koh-ichi Nagata<sup>1,2\*</sup>

<sup>1</sup>Department of Molecular Neurobiology, Institute for Developmental Research, Aichi Developmental Disability Center, Kasugai

<sup>2</sup>Department of Neurochemistry, Nagoya University Graduate School of Medicine, Nagoya, Japan

\*Corresponding author

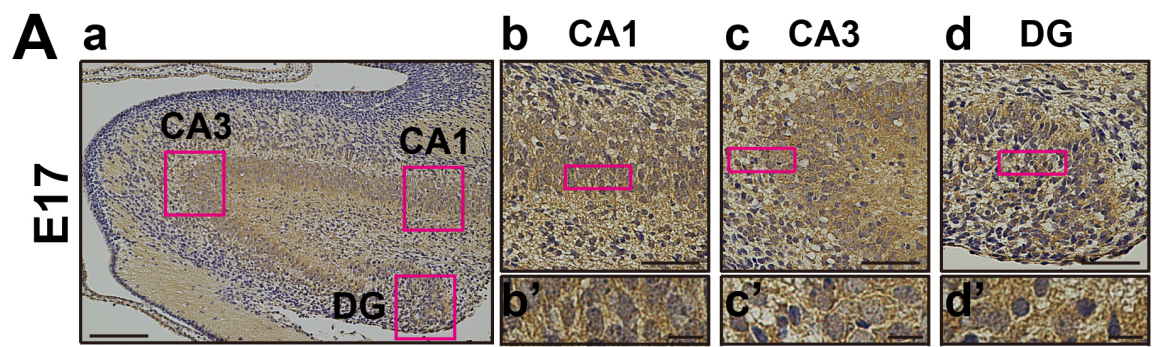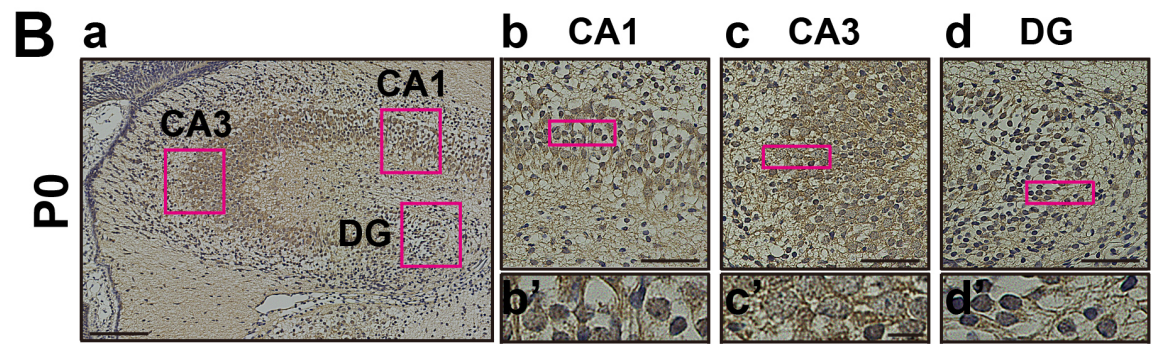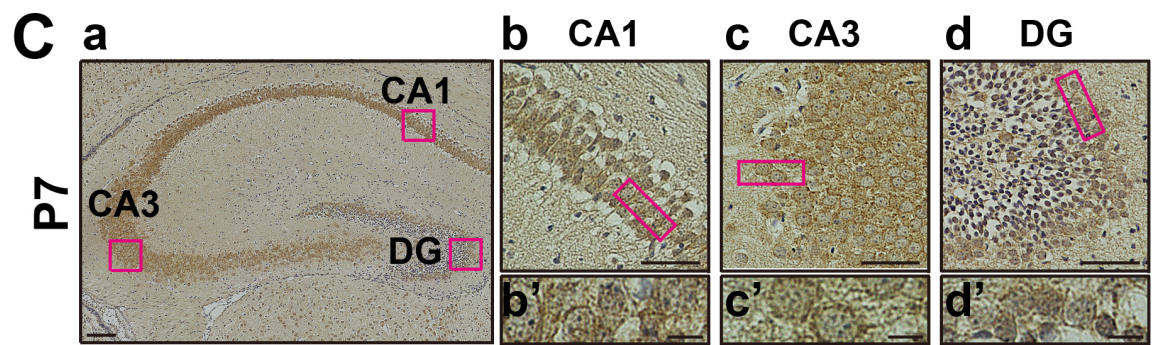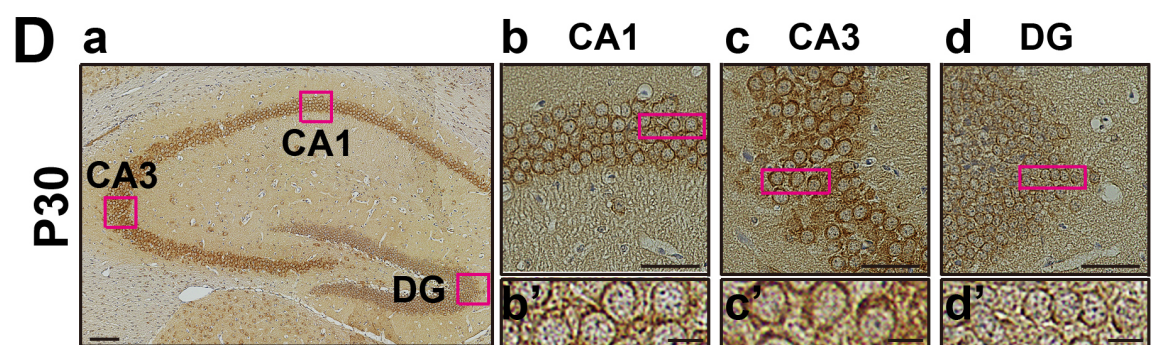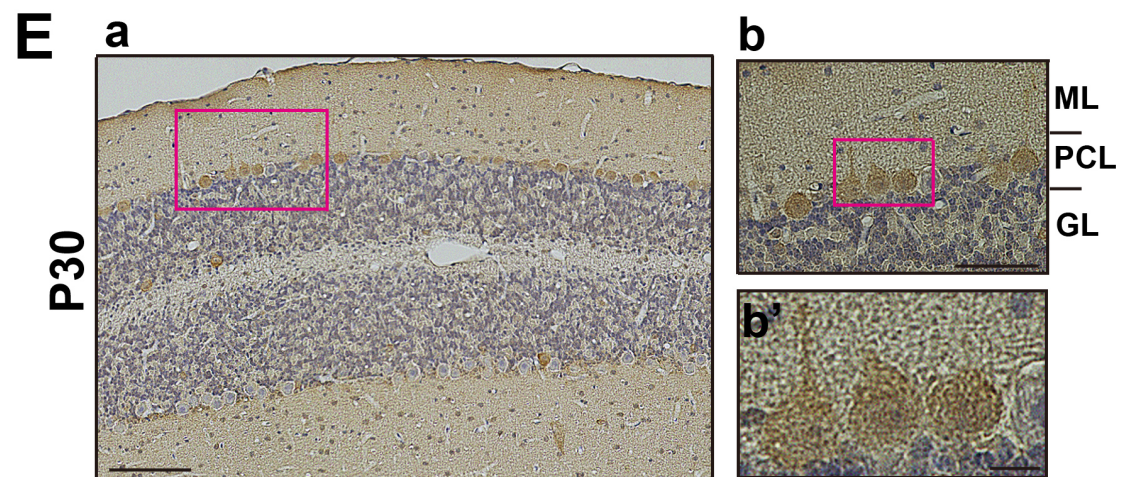



## **Supplementary Figure 1. Immunohistochemical analyses of Wdr45 in hippocampus and cerebellum**

Hippocampal sections at E17 (**A**), P0 (**B**), P7 (**C**) and P30 (**D**) were stained with anti-WDR45. Boxed areas in (a) were magnified in (b) – (d). Boxed areas in (b) – (d) were magnified in (b') – (d'), respectively. CA, *cornu ammonis*; DG, dentate gyrus. (**E**) A cerebellar section at P30 was stained with anti-WDR45. Boxed areas in (a) and (b) were magnified in (b) and (b'), respectively. Layers were indicated in (b). ML, molecular layer; PCL, Purkinje cell layer; GL, granular layer. Counter staining was done with Mayer's hematoxylin. Scale bars; 100  $\mu\text{m}$  (A-E,a), 50  $\mu\text{m}$  (A-D,b-d and E,b) and 10  $\mu\text{m}$  (A-D,b'-d' and E,b').

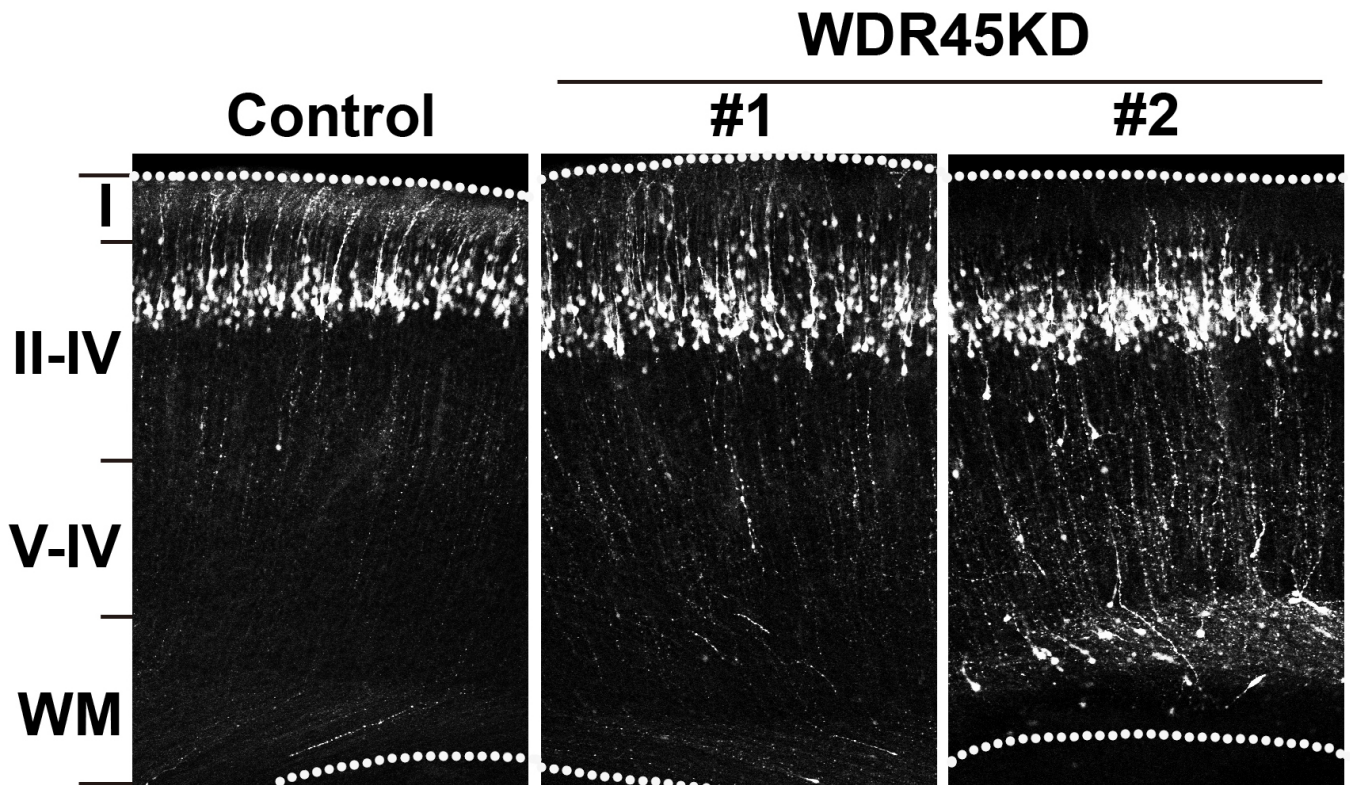

**Supplementary Figure 2. Effects of Wdr45-knockdown on cortical neuron migration during corticogenesis.**

pCAG-TurboRFP was co-electroporated with pSuper-H1.shLuc (control) or pSuper-Wdr45#1 or #2 into the VZ progenitors at E14.5. Coronal sections were prepared at P2 and stained for RFP. Dotted lines represent the pial (*upper*) and the ventricular (*lower*) surfaces.



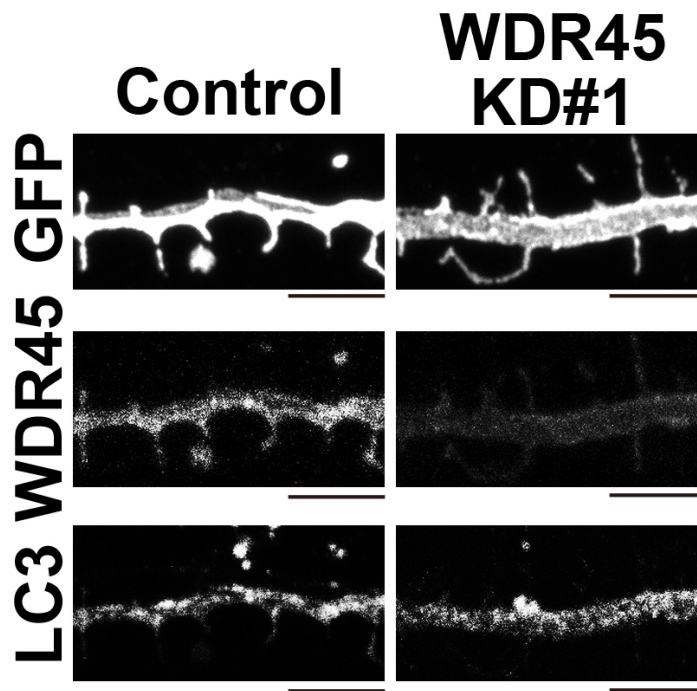

**Supplementary Figure 3. Effects of Wdr45-knockdown on LC3 expression.**

pCAG-TurboRFP was co-electroporated with pSuper-H1.shLuc (Control) or pSuper-Wdr45#1(KD#1) into the VZ progenitors at E14.5. Coronal sections were prepared at P2 and stained for Wdr45 and LC3. Representative images of dendritic spines on the 1st-order apical dendrites were shown. Scale bars, 5  $\mu$ m.

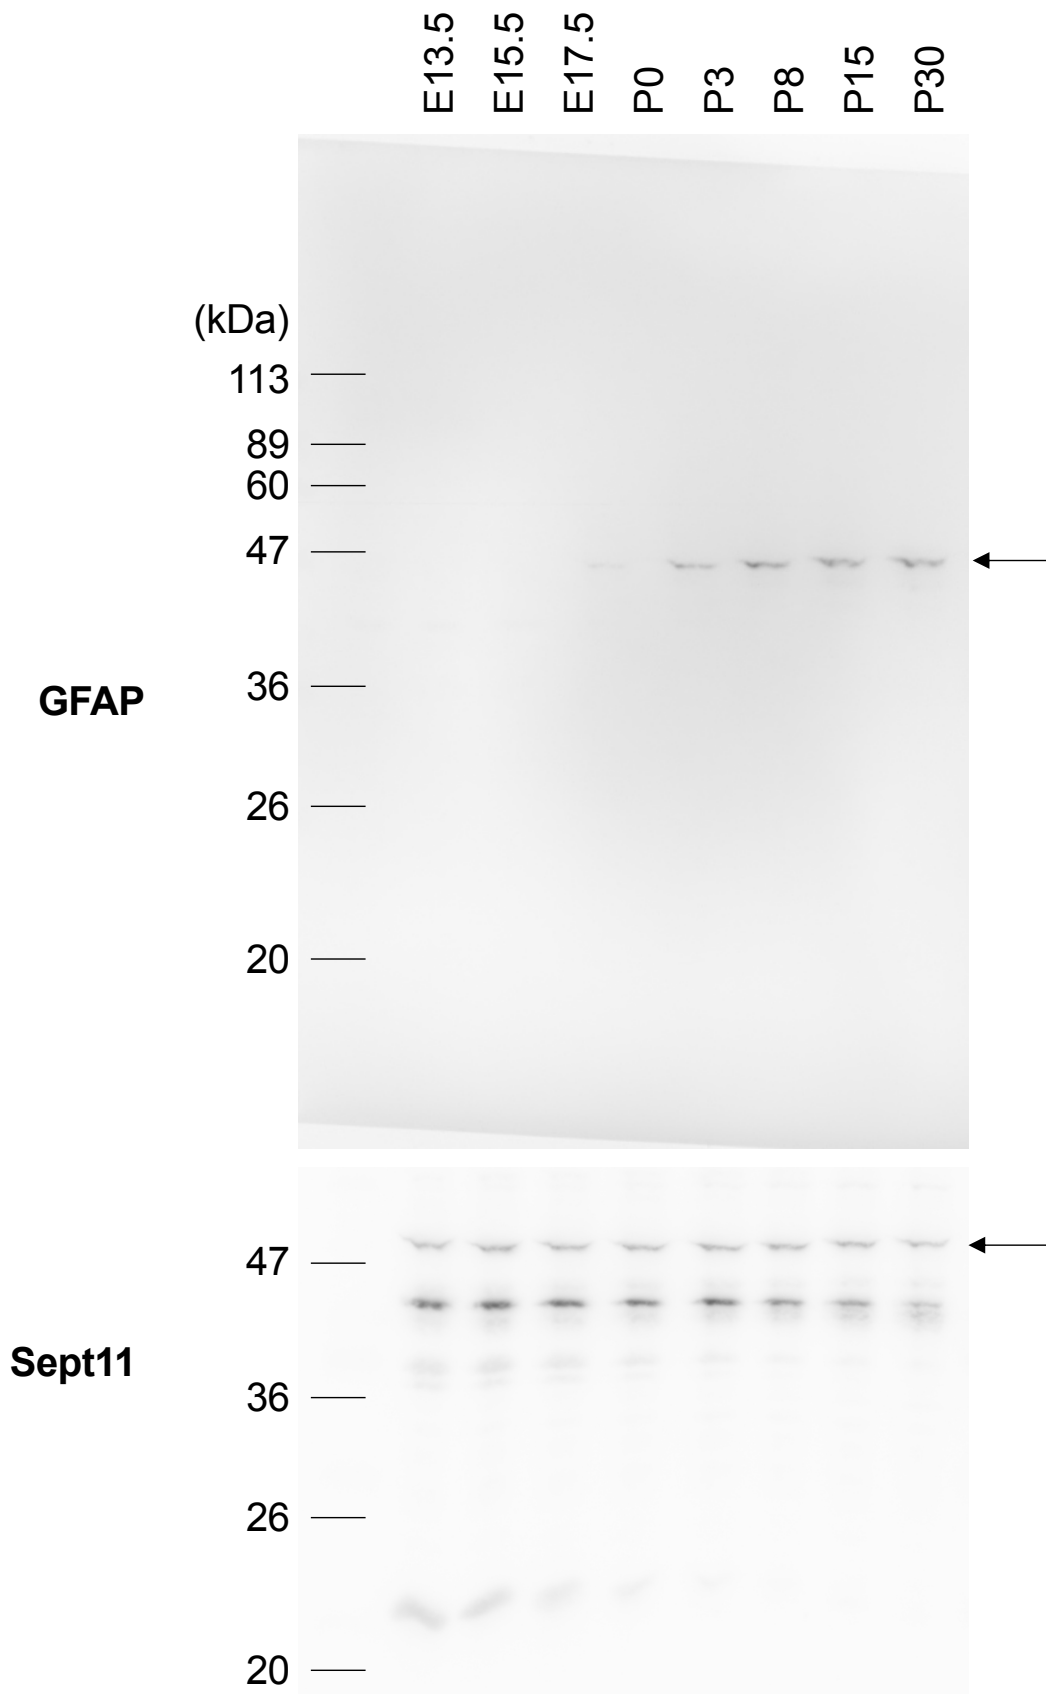

**Supplementary Figure 4. Uncropped blots of Figure 1B**

Western blot of protein samples immunoblotted with anti-GFAP and anti-Sept11. The protein bands shown in Figure1B are indicated by arrows.



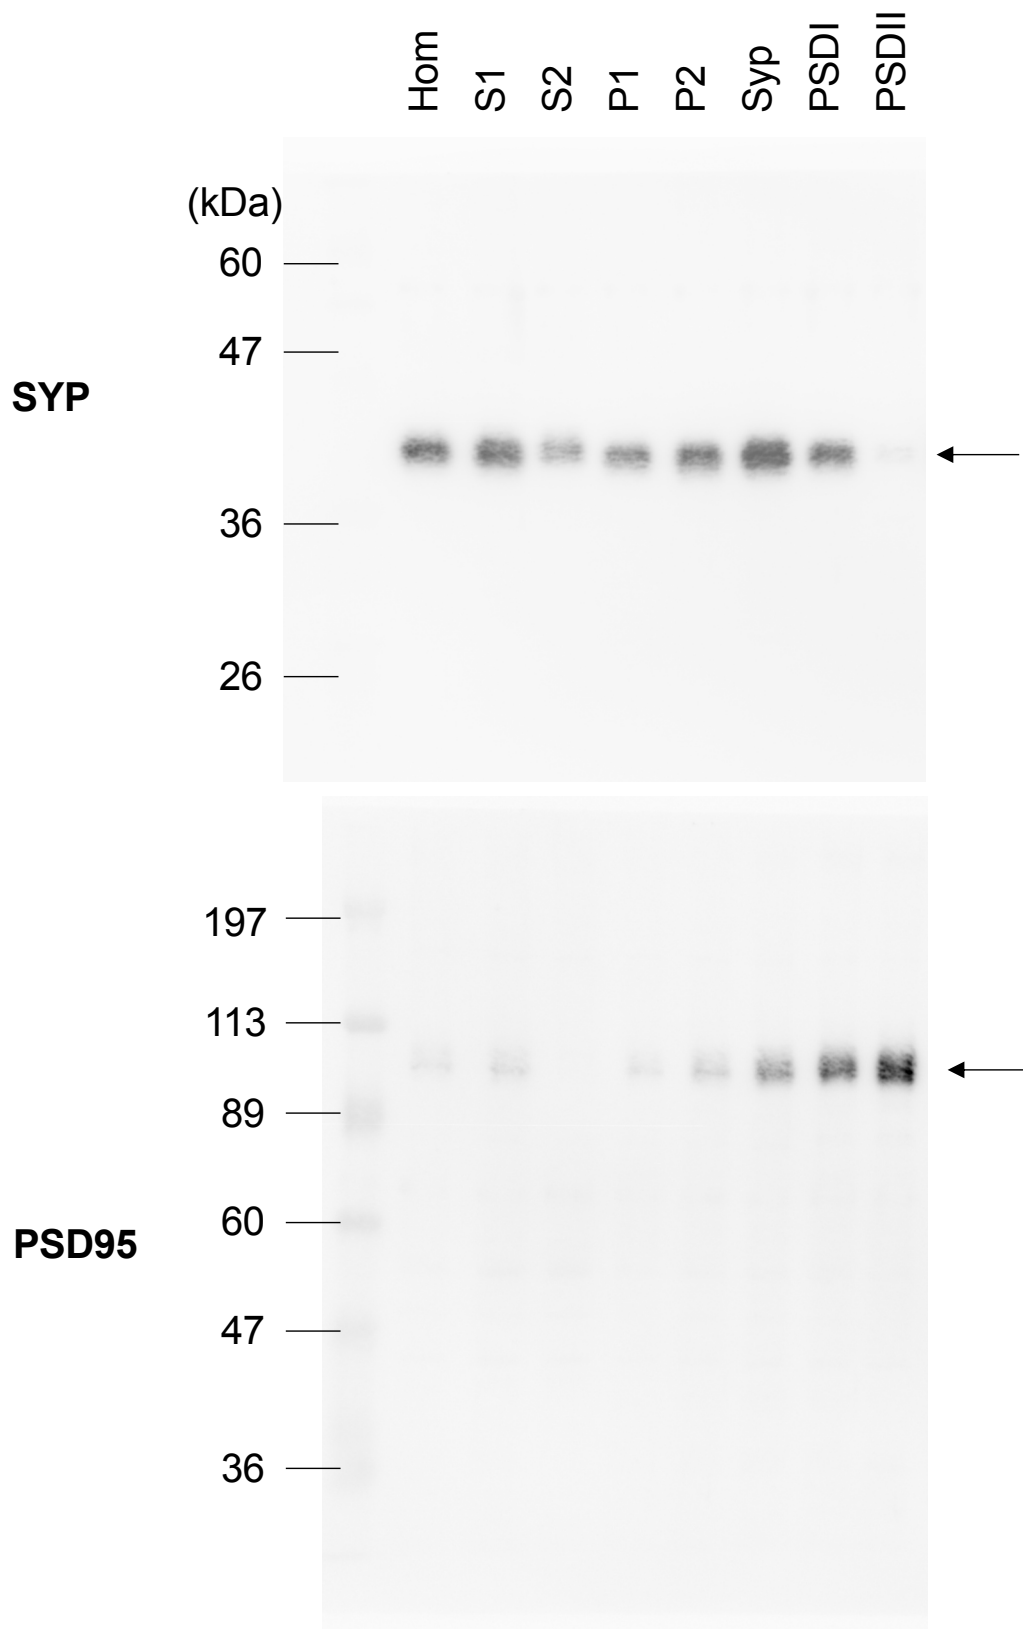

**Supplementary Figure 5. Uncropped blots of Figure 1C**

Western blot of protein samples immunoblotted with anti-Synaptophysin (SYP) and anti-PSD95. The protein bands shown in Figure1C are indicated by arrows.

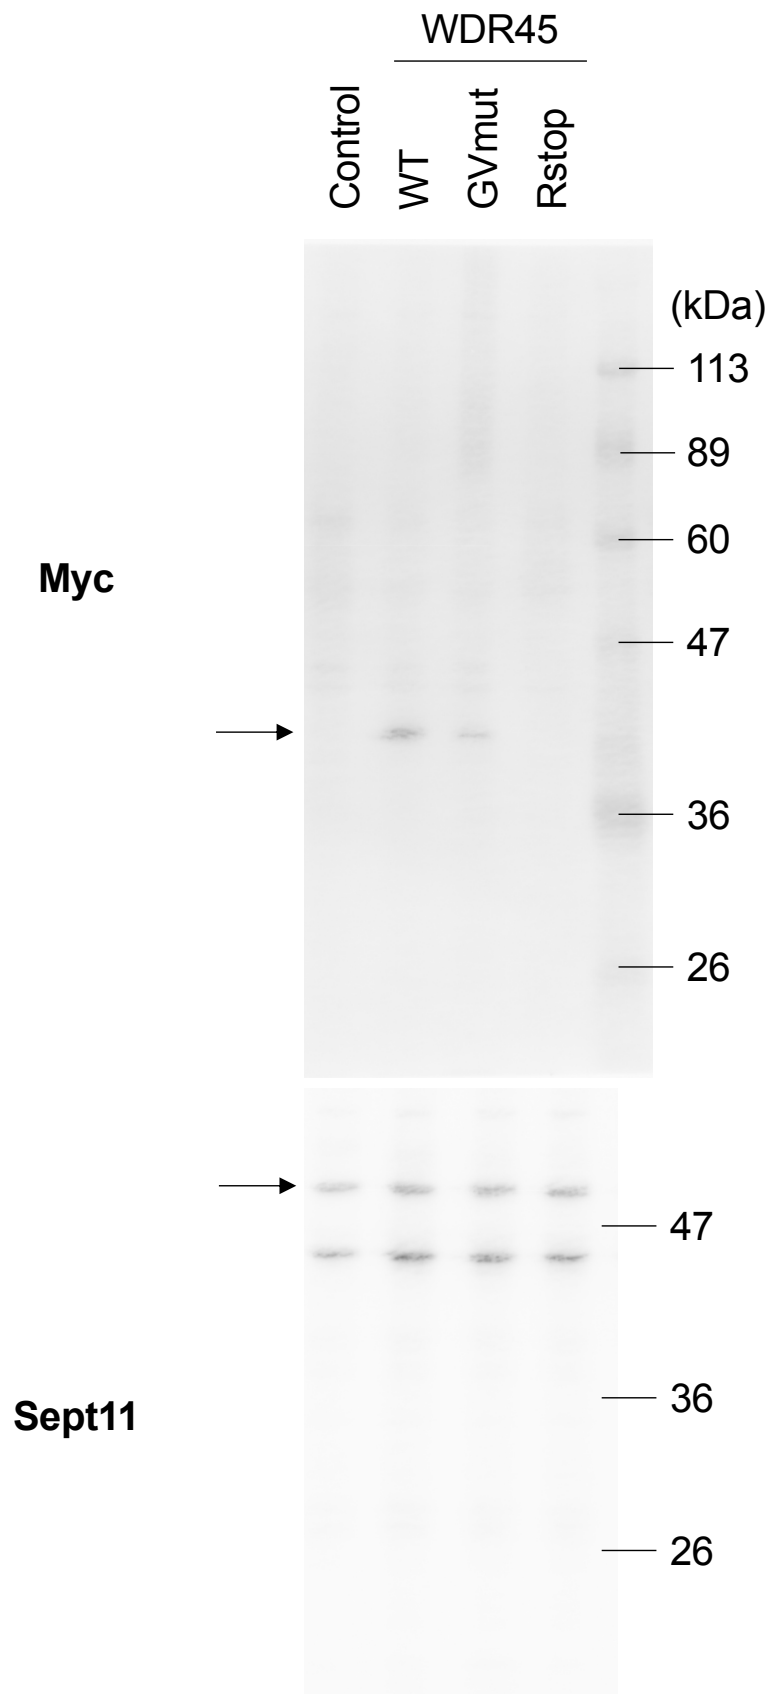

**Supplementary Figure 6. Uncropped blots of Figure 3A**

Western blot of protein samples immunoblotted with anti-Myc and anti-Sept11. The protein bands shown in Figure 3A are indicated by arrows.



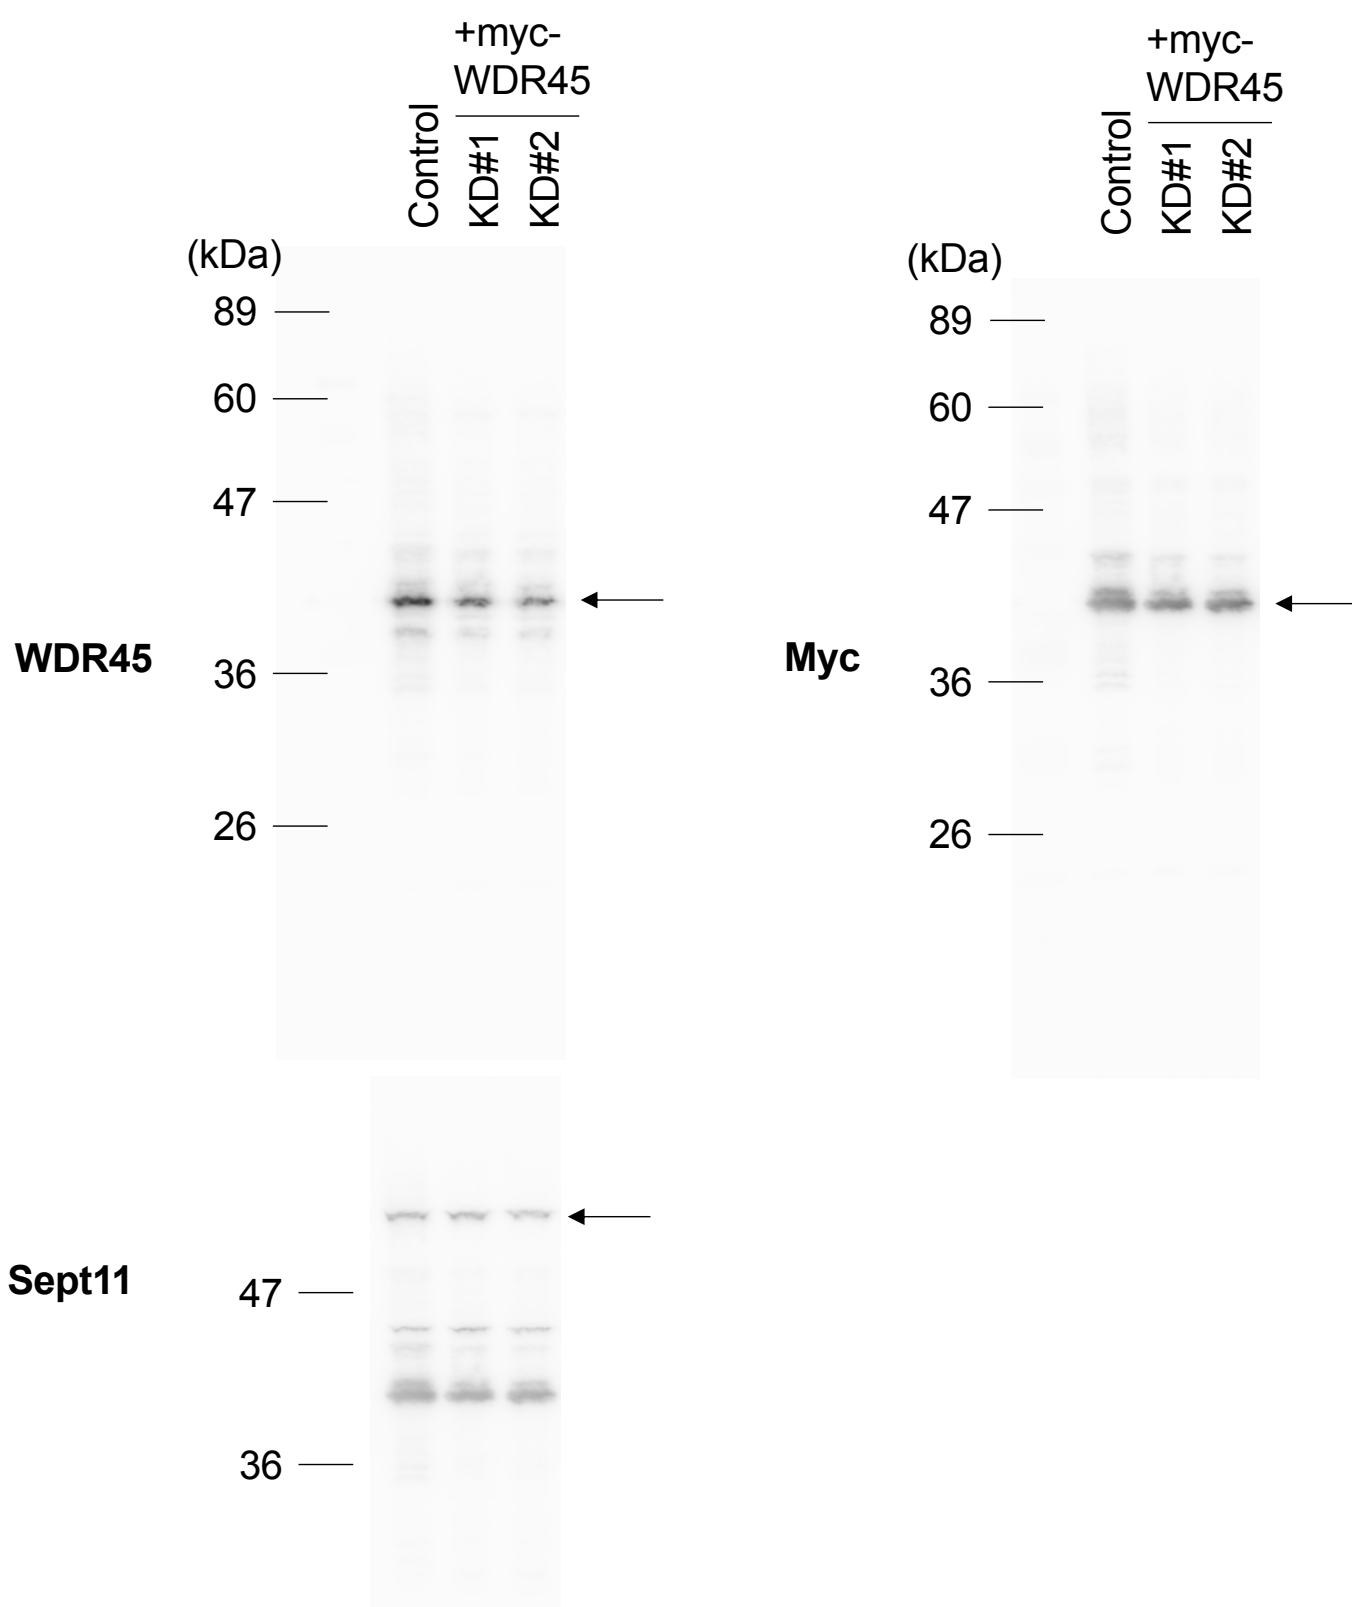

### Supplementary Figure 7. Uncropped blots of Figure 3B

Western blot of protein samples immunoblotted with anti-WDR45, anti-Myc and anti-Sept11. The protein bands shown in Figure3B are indicated by arrows.

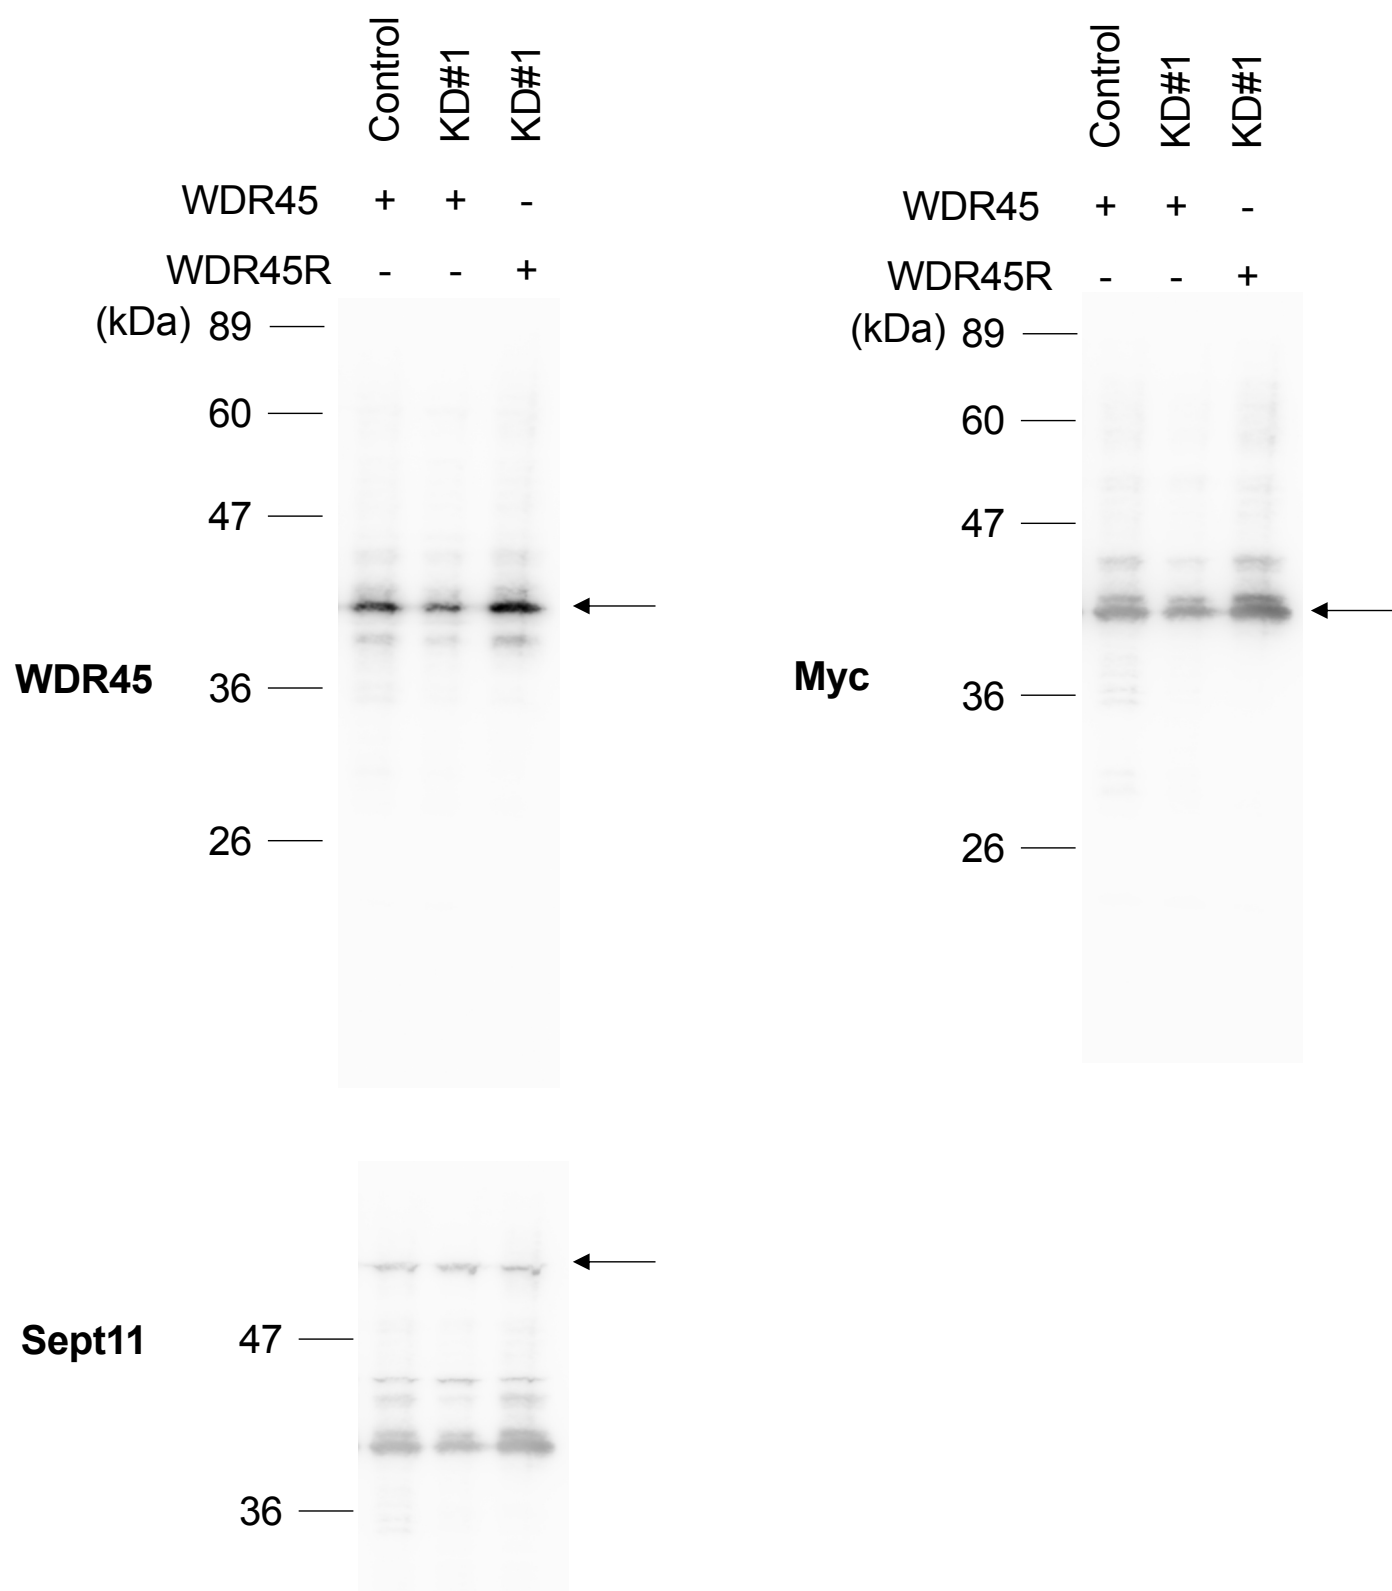

### Supplementary Figure 8. Uncropped blots of Figure 3D

Western blot of protein samples immunoblotted with anti-WDR45, anti-Myc and anti-Sept11. The protein bands shown in Figure3D are indicated by arrows.
